# Supplementary material for: Ordered interface regulation at Zn electrodes induced by trace gum additives for high-performance aqueous batteries
Source: Royal Society of Chemistry journal article supplement (doi:10.1039/d4ee04100c), 2025-01-01
Supplement: d4ee04100c1.pdf [file d4ee04100c1.pdf]

Electronic Supplementary Information for

**Ordered interface regulation at Zn electrodes induced by trace gum additives  
for high-performance aqueous batteries**

Kuo Wang,<sup>a‡</sup> Hongtu Zhan,<sup>a‡</sup> Wenlong Su,<sup>a‡</sup> Xiao-Xia Liu<sup>abc</sup> and Xiaoqi Sun<sup>\*ab</sup>

<sup>a</sup> Department of Chemistry, Northeastern University, Shenyang 110819, China

<sup>b</sup> National Frontiers Science Center for Industrial Intelligence and Systems Optimization, Northeastern University, Shenyang, 110819, China

<sup>c</sup> Key Laboratory of Data Analytics and Optimization for Smart Industry (Northeastern University), Ministry of Education, China

<sup>‡</sup> These authors contributed equally to this work.

E-mail: sunxiaoqi@mail.neu.edu.cn

## Supplementary figures and tables

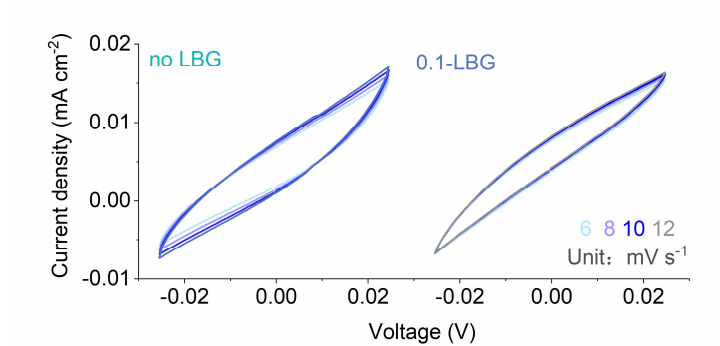

**Fig. S1** CV curves of Zn symmetric cells in the non-Faradic range in 1 m  $\text{ZnSO}_4$  and 0.1-LBG electrolytes.

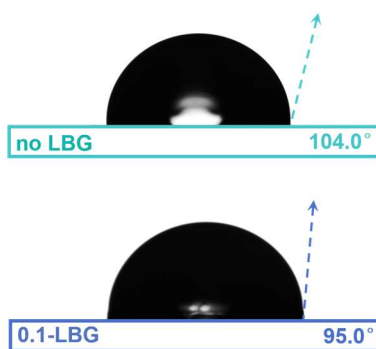

**Fig. S2** Contact angles of 1 m  $\text{ZnSO}_4$  and 0.1-LBG on Zn foil.

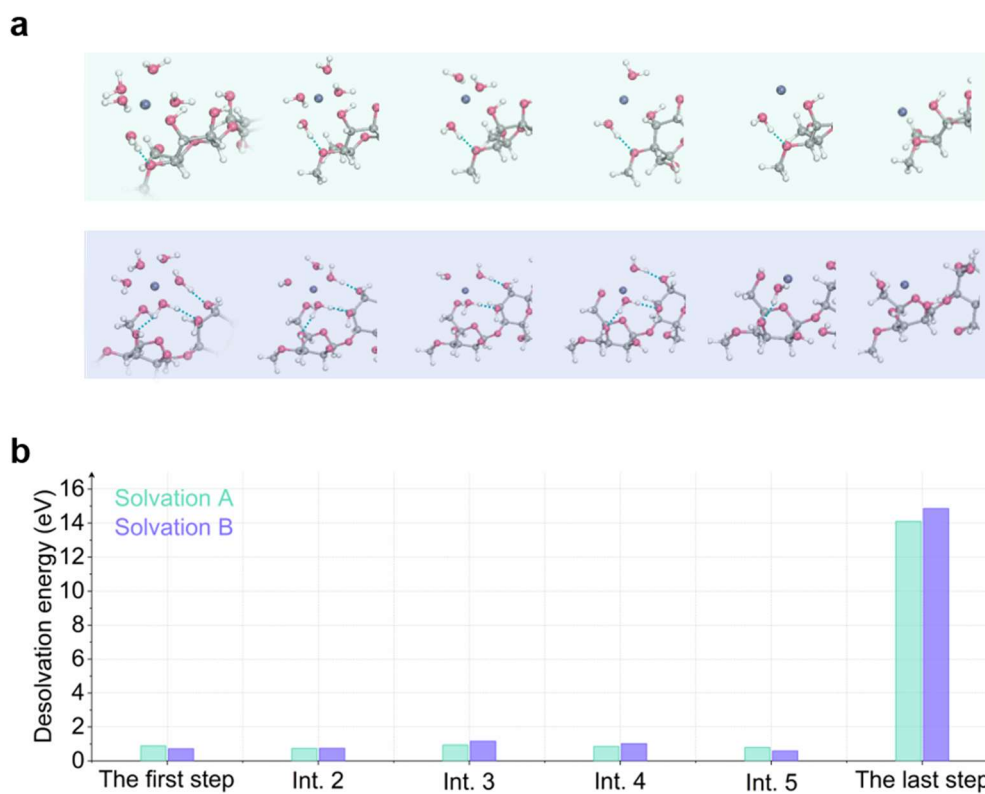

**Fig. S3** a) The structures and b) energy barriers at each step along the desolvation paths of the two  $\text{Zn}(\text{H}_2\text{O})_5\text{LBG}^{2+}$  structures (A and B).

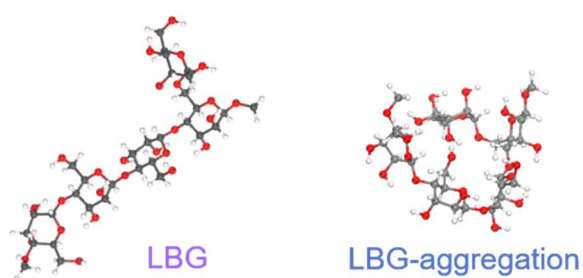

**Fig. S4** The two configurations of LBG unit with a slight energy reduction of 0.11 eV after aggregation.

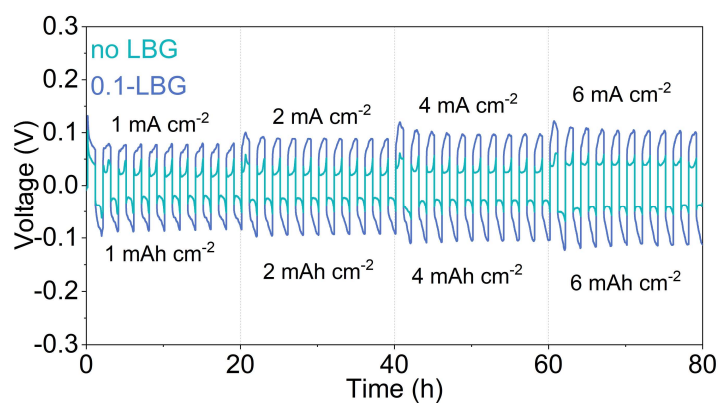

**Fig. S5** The rate performance of Zn symmetric cells in the baseline ZnSO<sub>4</sub> and 0.1-LBG electrolytes.

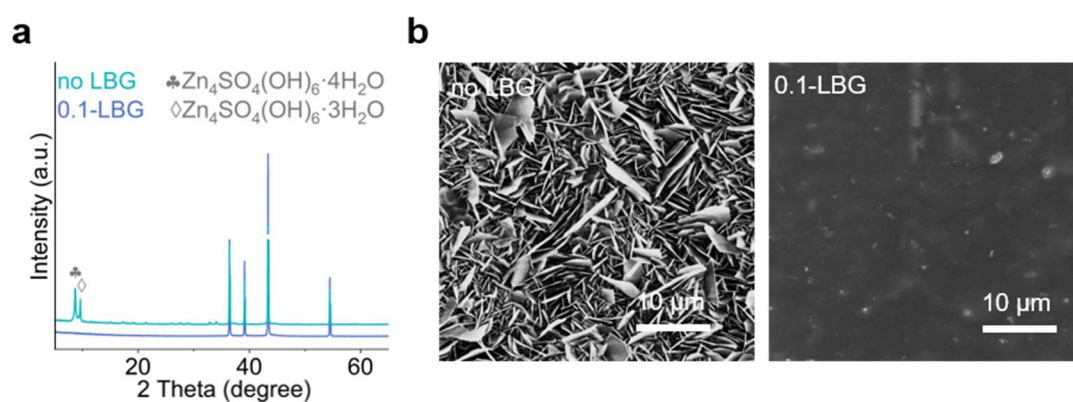

**Fig. S6** a) XRD patterns and b) SEM images of Zn soaked in the baseline ZnSO<sub>4</sub> and 0.1-LBG solutions for 1 day.

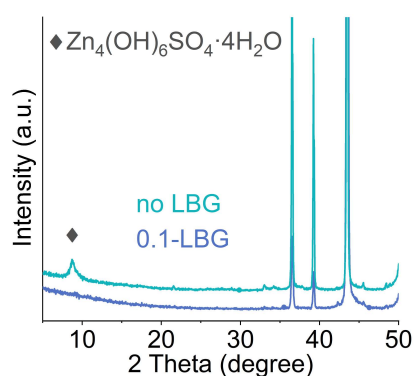

**Fig. S7** XRD patterns of Zn deposition on Cu substrate for 10 mAh cm<sup>-2</sup> in the baseline ZnSO<sub>4</sub> and 0.1-LBG electrolytes.

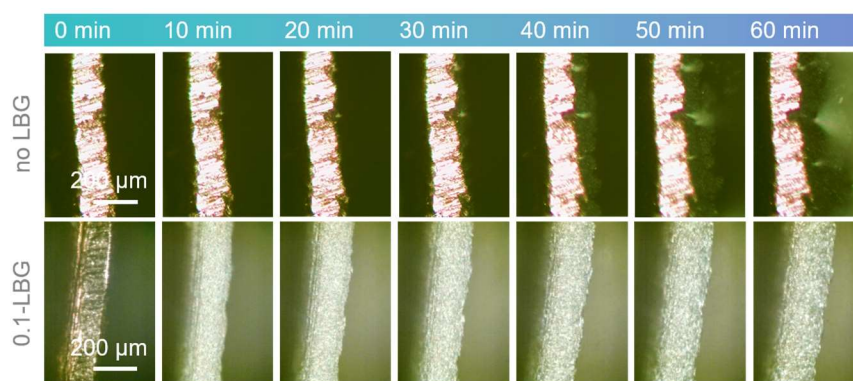

**Fig. S8** Side views of in-situ optical microscopy images of Zn deposition at  $10 \text{ mA cm}^{-2}$  in the two electrolytes.

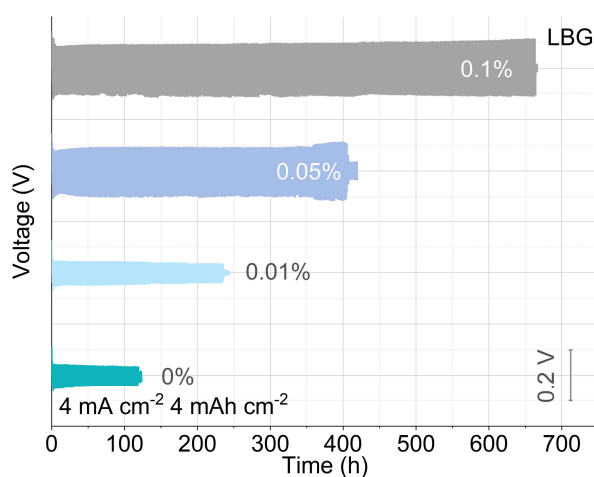

**Fig. S9** Long-term cycling of Zn symmetric cells with the  $\text{ZnSO}_4$  electrolytes containing different percentages of LBG.

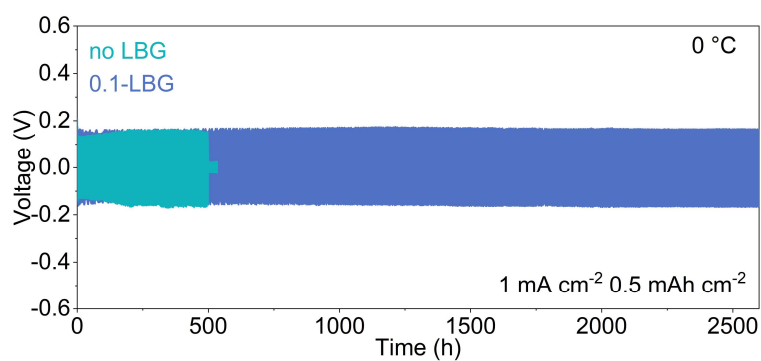

**Fig. S10** Cycling performance of Zn symmetric cells at  $0 \text{ }^\circ\text{C}$  with the  $\text{ZnSO}_4$  and 0.1-LBG electrolytes.

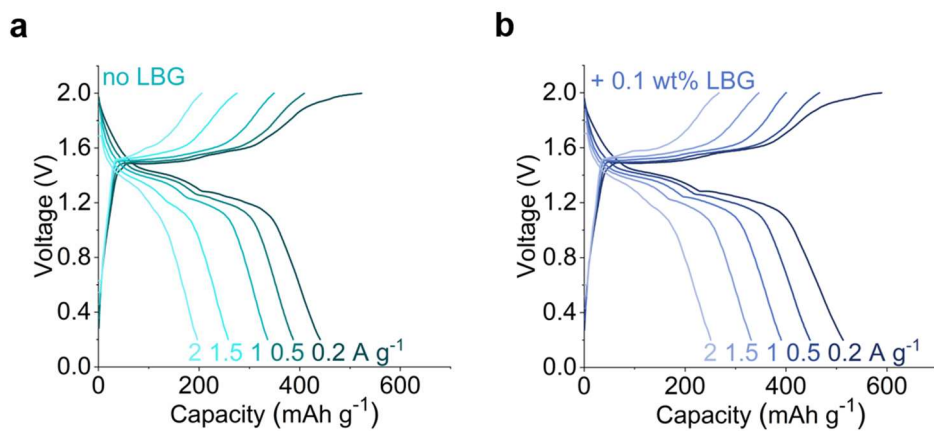

**Fig. S11** Charge/discharge curves of Zn//MnO<sub>2</sub> cells at different current densities in a) the baseline electrolyte and b) after 0.1 wt% LBG addition.

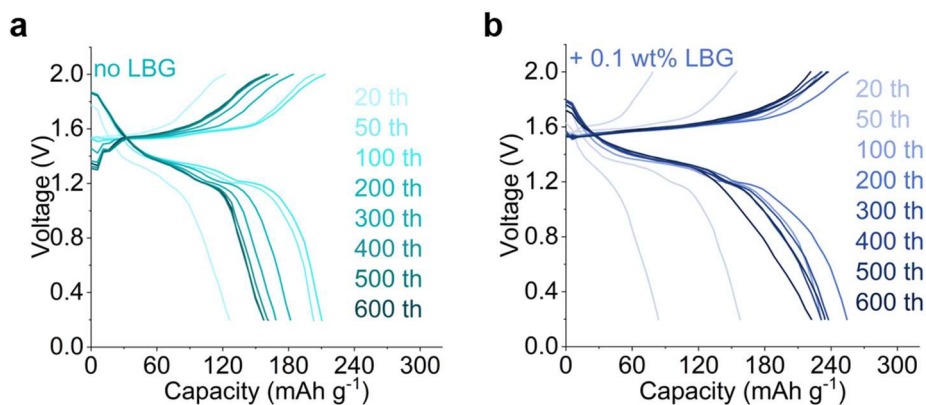

**Fig. S12** Charge/discharge curves of Zn//MnO<sub>2</sub> cells at different cycles in a) the baseline electrolyte and b) after 0.1 wt% LBG addition.

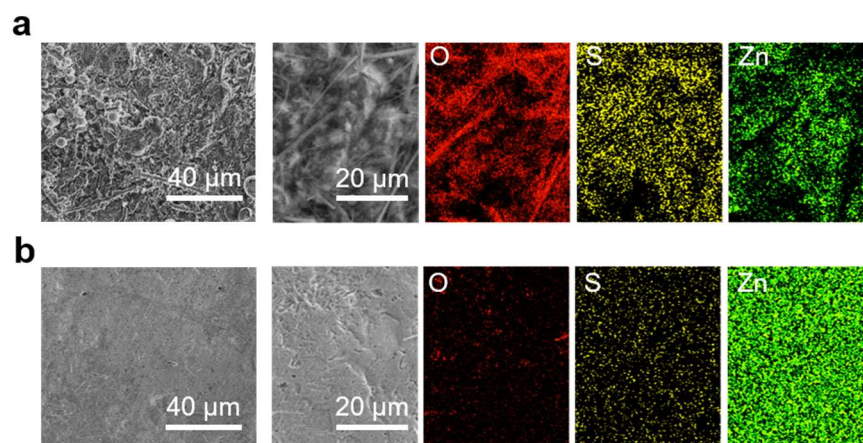

**Fig. S13** SEM images and EDS mappings of Zn anode after 200 cycles at  $2 \text{ A g}^{-1}$  from full cells with a) the baseline electrolyte and b) after 0.1 wt% LBG addition.

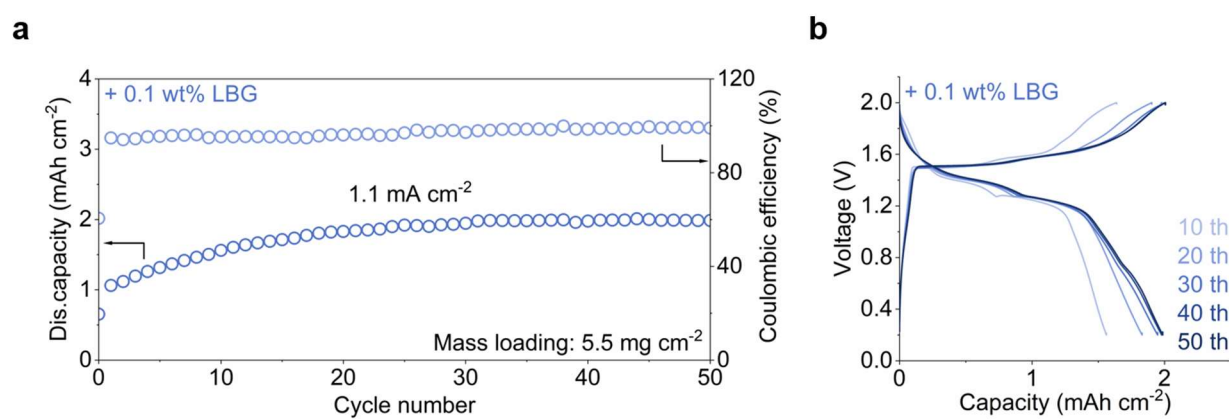

**Fig. S14** a) The capacity evolution and b) charge/discharge curves at different cycles of the Zn//MnO<sub>2</sub> pouch cell in the LBG containing electrolyte.

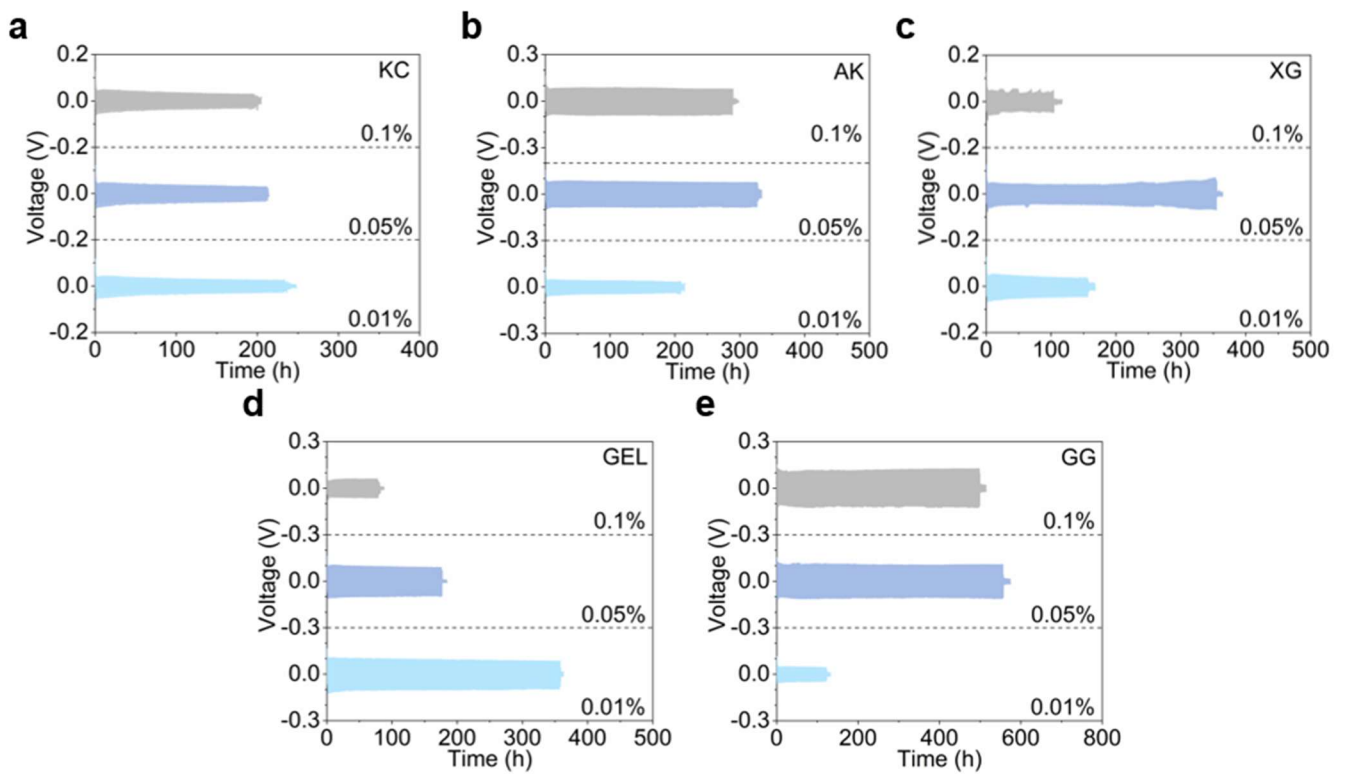

**Fig. S15** The cycling performance of Zn symmetric cells with different gum additives at 4 mA cm<sup>-2</sup> and 4 mAh cm<sup>-2</sup>.



**Table S1** The desolvation energy barrier at each step of  $\text{Zn}(\text{H}_2\text{O})_6^{2+}$  and the three  $\text{Zn}(\text{H}_2\text{O})_5\text{LBG}^{2+}$  solvation structures

| Desolvation step | $\text{Zn}(\text{H}_2\text{O})_6^{2+}$ | Solvation A | Solvation B | Solvation C |
|------------------|----------------------------------------|-------------|-------------|-------------|
| I                | 1.0 eV                                 | 0.9 eV      | 0.7 eV      | 0.9 eV      |
| II               | 1.3 eV                                 | 0.7 eV      | 0.7 eV      | 0.4 eV      |
| III              | 2.1 eV                                 | 0.9 eV      | 1.2 eV      | 1.0 eV      |
| IV               | 2.7 eV                                 | 0.9 eV      | 1.0 eV      | 1.2 eV      |
| V                | 4.0 eV                                 | 0.8 eV      | 0.6 eV      | 1.1 eV      |
| VI               | 4.6 eV                                 | 14.1 eV     | 14.9 eV     | 14.6 eV     |

**Table S2** The H-bond lengths among solvated LBG and water during the desolvation paths of the three  $\text{Zn}(\text{H}_2\text{O})_5\text{LBG}^{2+}$  solvation structures, which are all shorter than 1.92 Å for typical  $\text{H}_2\text{O}-\text{H}_2\text{O}$ .

| Desolvation step                                 | Solvation A | Solvation B      | Solvation C      |
|--------------------------------------------------|-------------|------------------|------------------|
| $\text{Zn}(\text{H}_2\text{O})_5\text{LBG}^{2+}$ | 1.64 Å      | 1.86/1.66/1.60 Å | 1.61/1.66/1.63 Å |
| $\text{Zn}(\text{H}_2\text{O})_4\text{LBG}^{2+}$ | 1.66 Å      | 1.75/1.56/1.62 Å | 1.67/1.58 Å      |
| $\text{Zn}(\text{H}_2\text{O})_3\text{LBG}^{2+}$ | 1.62 Å      | 1.71/1.64/1.52 Å | 1.63/1.62 Å      |
| $\text{Zn}(\text{H}_2\text{O})_2\text{LBG}^{2+}$ | 1.64 Å      | 1.73/1.92/1.64 Å | 1.66/1.60 Å      |
| $\text{Zn}(\text{H}_2\text{O})\text{LBG}^{2+}$   | 1.64 Å      | 1.67 Å           | 1.60 Å           |

**Table S3** Comparison of additive costs and concentrations in the electrolytes with previous studies.

| Additive category  | Additive                                         | Additive concentration (g L <sup>-1</sup> ) | Additive price (USD L <sub>electrolyte</sub> <sup>-1</sup> ) |
|--------------------|--------------------------------------------------|---------------------------------------------|--------------------------------------------------------------|
| Organic powder     | Na <sub>4</sub> EDTA                             | 29.1                                        | 0.73                                                         |
|                    | Arginine                                         | 17.4                                        | 0.94                                                         |
|                    | PEO                                              | 1.2                                         | 1.86                                                         |
|                    | TMAC                                             | 75.8                                        | 9.1                                                          |
|                    | Dopamine                                         | 9.5                                         | 11.5                                                         |
|                    | Succinonitrile                                   | 985                                         | 177.3                                                        |
|                    | TEHC                                             | 206.5                                       | 262.2                                                        |
|                    | Maltose                                          | 420                                         | 283.9                                                        |
| Organic solvent    | Methanol                                         | 396                                         | 3.96                                                         |
|                    | NMP                                              | 50                                          | 8.5                                                          |
|                    | DMF                                              | 45                                          | 10.8                                                         |
|                    | TEP                                              | 535                                         | 925.6                                                        |
|                    | DMSO                                             | 203                                         | 5.48                                                         |
| Salt               | KPF <sub>6</sub>                                 | 8.3                                         | 0.28                                                         |
|                    | LiCl                                             | 9.2                                         | 0.52                                                         |
|                    | Zn(H <sub>2</sub> PO <sub>4</sub> ) <sub>2</sub> | 84.8                                        | 1.02                                                         |
|                    | Ce <sub>2</sub> (SO <sub>4</sub> ) <sub>3</sub>  | 7.4                                         | 1.41                                                         |
|                    | NaClO <sub>4</sub>                               | 28.4                                        | 6.8                                                          |
|                    | EMImCl                                           | 2528.3                                      | 480.4                                                        |
| Gum<br>(This work) | LBG                                              | 1                                           | 0.064                                                        |
|                    | GG                                               | 0.5                                         | 0.087                                                        |
|                    | AK                                               | 0.5                                         | 0.043                                                        |
|                    | XG                                               | 0.5                                         | 0.021                                                        |
|                    | KC                                               | 0.1                                         | 0.009                                                        |
|                    | GEL                                              | 0.1                                         | 0.006                                                        |
